# Supplementary material for: Design, synthesis, characterization, cytotoxicity, molecular docking and analysis of binding interactions of novel acetylacetonatopalladium(ii) alanine and valine complexes with CT-DNA and BSA
Source: Royal Society of Chemistry journal article supplement (doi:10.1039/c6ra18803f), 2016-01-01
Supplement: c6ra18803f1.pdf [file c6ra18803f1.pdf]

Supporting information of

**Design, synthesis, characterization, cytotoxicity, molecular docking and analysis of binding interaction of novel acetylacetonatopalladium(II) alanine and valine complexes with CT-DNA and BSA**

A.Heydaria<sup>a</sup> and H. Mansouri-Torshizi\*<sup>a</sup>

Fig. S1. <sup>1</sup>H NMR spectrum of [Pd(acac)(Ala)]

Fig. S2. <sup>1</sup>H NMR spectrum of [Pd(acac)(Val)]

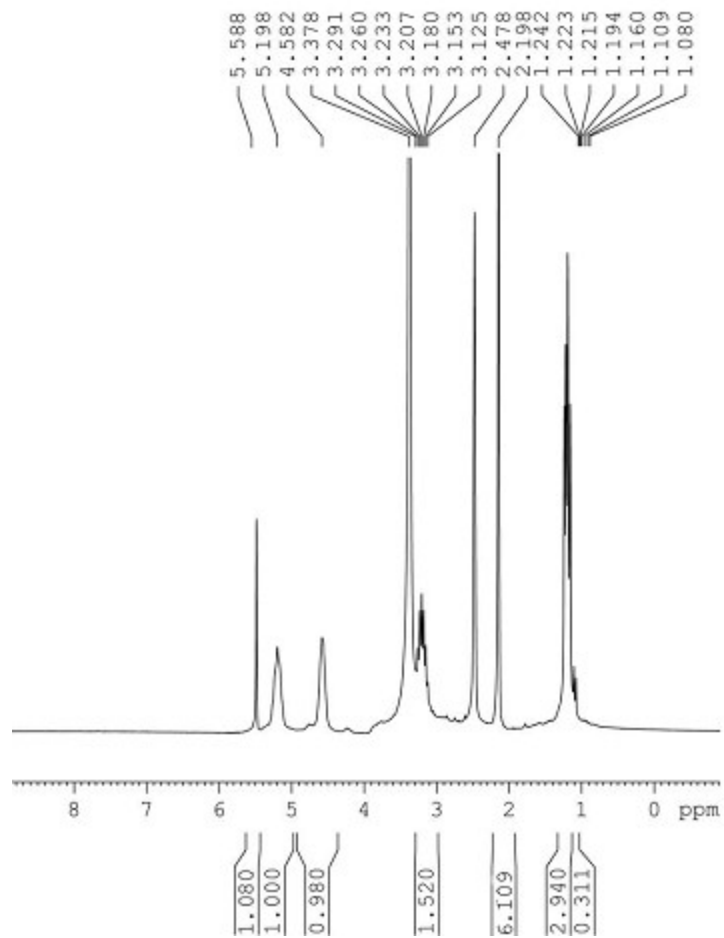

Fig. S1.  $^1\text{H}$  NMR spectrum of  $[\text{Pd}(\text{acac})(\text{Ala})]$

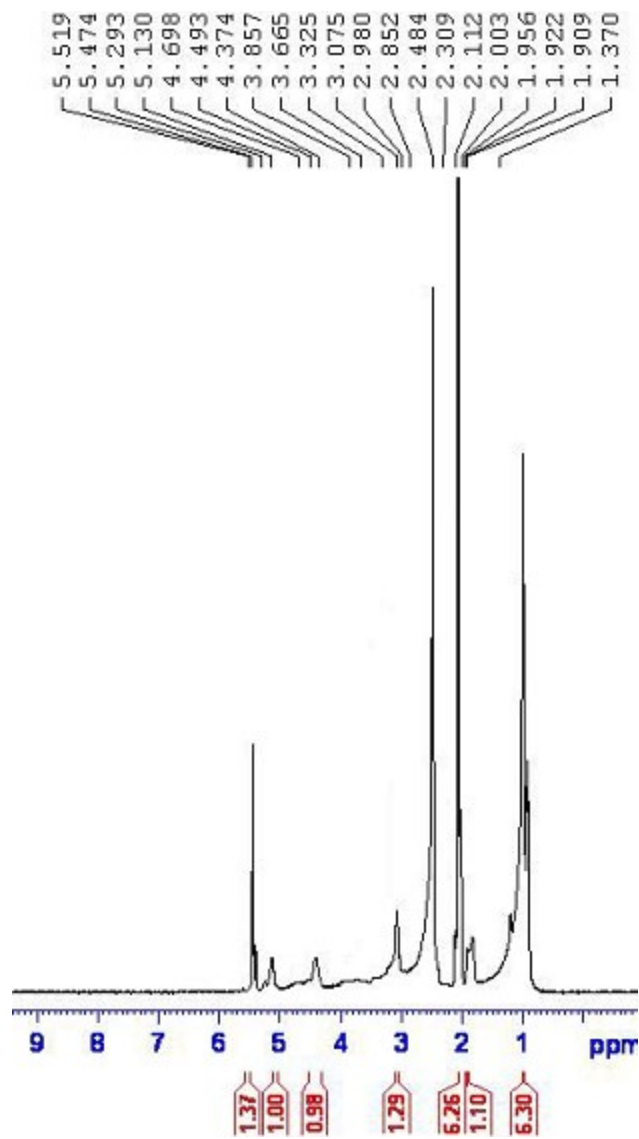

Fig. S2. <sup>1</sup>H NMR spectrum of [Pd(acac)(Val)]
